# Supplementary material for: A conducting metallopolymer featuring valence tautomerism
Source: Royal Society of Chemistry journal article supplement (doi:10.1039/b818952h), 2009-01-01
Supplement: b818952h.pdf [file b818952h.pdf]

## **A Conducting Metallopolymer featuring Valence Tautomerism**

*Thomas J. O'Sullivan,<sup>a</sup> Brandon Djukic,<sup>a</sup> Paul A. Dube<sup>b</sup>, and Martin T. Lemaire<sup>\*a</sup>*

<sup>a</sup>*Department of Chemistry, Brock University, 500 Glenridge Avenue, St. Catharines, ON,  
Canada, L2S 3A1, E-mail: mlemaire@brocku.ca*

<sup>b</sup>*Brockhouse Institute for Materials Research, McMaster University, Hamilton, Ontario, Canada*

### **SUPPORTING INFORMATION**

#### **CONTENTS**

|                                                                   |           |
|-------------------------------------------------------------------|-----------|
| <b>General experimental details</b>                               | <b>S2</b> |
| <b>Preparation of 1</b>                                           | <b>S3</b> |
| <b>Preparation of 2</b>                                           | <b>S3</b> |
| <b><sup>1</sup>H &amp; <sup>13</sup>C NMR spectra of 1</b>        | <b>S4</b> |
| <b>EDX data for 2 and polymer film</b>                            | <b>S5</b> |
| <b>Cyclic voltammogram of 1 in CH<sub>2</sub>Cl<sub>2</sub></b>   | <b>S5</b> |
| <b>Electropolymerization of 1 in CH<sub>2</sub>Cl<sub>2</sub></b> | <b>S6</b> |
| <b>Vis-NIR spectra of poly 1 at 298 and 77 K</b>                  | <b>S6</b> |
| <b>Visible spectrum of 2 at 298 and 77 K in toluene</b>           | <b>S7</b> |
| <b>μ vs. T for poly 1 and poly 2 on ITO glass.</b>                | <b>S7</b> |
| <b>References</b>                                                 | <b>S8</b> |

## GENERAL EXPERIMENTAL DETAILS

All reagents were commercially available and used as received unless otherwise stated. Deaerated and anhydrous solvents were obtained from a Puresolve PS MD-4 solvent purification system, and all air and/or moisture sensitive reactions were carried out using standard Schlenk techniques, unless otherwise stated.  $^1\text{H}/^{13}\text{C}$ -NMR spectra were recorded on a Bruker Advance 300 MHz spectrometer with a 7.05 T Ultrashield magnet using deuterated solvents. FT-IR spectra were recorded on a ThermoMattson RS-1 spectrometer as KBr discs or thin films on NaCl plates. EI and FAB mass spectra were obtained using a Kratos Concept 1S High Resolution E/B mass spectrometer. Vis-NIR spectra in solution were recorded on a Shimadzu 3600 UV-Vis-NIR spectrophotometer as solutions in ethanol at room temperature. Solution spectra at 77 K were obtained as frozen ethanol glasses in 5 mm NMR tubes immersed in a liquid  $\text{N}_2$  dewar. Elemental analyses were carried out by Guelph Chemical Laboratories LTD, Guelph, ON, Canada. EDX spectra were obtained on a Pentafet EDS with Link Systems detector (beryllium windows, 20 kV energy).

### Electrochemical measurements

Cyclic voltammetry (CV) experiments were performed with a Bioanalytical Systems Inc. Epsilon electrochemical workstation. **2** was dissolved in anhydrous solvent ( $\text{CH}_2\text{Cl}_2$ ) and deaerated by sparging with  $\text{N}_2$  gas for 20 minutes. Solution concentrations were approximately  $10^{-3}$  M in **2** containing 0.1 M supporting electrolyte ( $\text{Bu}_4\text{NPF}_6$ ). A typical three-electrode set-up was used including a platinum working electrode (or an ITO coated glass cuvette slide), Ag wire pseudo-reference electrode, and a platinum wire auxiliary electrode. Ferrocene was used in all cases as an internal standard and was oxidized at a potential of +0.51 V in our set up; all potentials quoted are versus the ferrocene oxidation potential. The scan rate for all CV experiments was 100 mV/s.

### Variable temperature magnetic susceptibility measurements

Variable temperature magnetic susceptibility measurements were recorded on a superconducting quantum interference device (SQUID) magnetometer (Quantum Design MPMS) with a 5.5 T magnet (temperature range 1.8 to 400 K) in an external field of 5000 Oe. **2** was carefully weighed into a gelatin capsule, which was loaded into plastic straw, and attached to the sample transport rod. Diamagnetic corrections were made using Pascal's constants. Diamagnetic contributions from the straw and capsule were subtracted by running these free of sample.

### Variable temperature Vis-NIR measurements of poly 1 and poly 2

Polymer films were grown electrochemically on ITO coated glass cuvette slides (obtained from Delta Technologies, LTD), which were cut in half prior to electropolymerization. The half slide free of polymer film was used in a background scan for the particular Vis-NIR measurement of **poly 1** or **poly 2**. At room temperature, a background scan was recorded from 2000 to 400 nm, consisting of the film free slide held rigidly in place with a homemade film holder in an empty quartz dewar. The placement of the slide was such that the ITO coated side (determined by using an ohm meter) was always facing the light beam. Next, the slide containing the polymer film was attached to the film holder and lowered into the empty quartz dewar, and we ensured that the coated part of the slide faced the light beam. The spectrum from 2000 to 400 nm was recorded. Measurements at 77 K were identical, with the exception that the background scan consisted of the uncoated slide and dewar containing liquid nitrogen.

**3'-(5-ethynyl-2,2'-bipyridine)-2,2':5',2'-terthiophene (1).** 5-ethynyl-2,2'-bipyridine<sup>1</sup> (0.681 g, 3.78 mmol) and 3'-bromo-2,2':5',2'-terthiophene<sup>2</sup> (0.825 g, 2.52 mmol) were dissolved in deaerated and anhydrous *N,N*-diisopropylamine (65 mL). PdCl<sub>2</sub>(PPh<sub>3</sub>)<sub>2</sub> (0.053 g, 3 mol %) and CuI (0.014 g, 3 mol %) were added to the reaction mixture, which was refluxed for 60 h. The reaction mixture was concentrated and passed through a pad of celite. The filtrate was then extracted into CHCl<sub>3</sub> (3 × 60 mL), washed with brine, dried over magnesium sulfate, filtered, and concentrated to dryness. The crude product was flash chromatographed over neutral alumina using 10:1 hexanes:EtOAc as eluent to yield 0.637 g (59%) of a brilliant yellow solid. Mp: 143-145°C. <sup>1</sup>H-NMR (300 MHz, CDCl<sub>3</sub>) = δ 8.90 (d, 1H, *J* = 3 Hz), 8.72 (dd, 1H, *J* = 6, 3 Hz), 8.48 (dd, 2H, *J* = 9, 3 Hz), 7.98 (dd, 1H, *J* = 9, 3 Hz), 7.85 (td, 1H, *J* = 9, 3 Hz), 7.52 (dd, 1H, *J* = 6, 3 Hz), 7.34 (m, 5H), 7.10 (dd, 1H, *J* = 9, 3 Hz), 7.06 (dd, 1H, *J* = 9, 3 Hz) ppm. <sup>13</sup>C-NMR (CDCl<sub>3</sub>) = δ 155.4, 154.9, 151.4, 149.3, 139.2, 139.0, 137.0, 136.0, 135.5, 134.4, 128.0, 127.3, 126.7, 126.1, 125.8, 125.2, 124.3, 124.0, 121.3, 120.4, 120.2, 117.1, 91.2, 89.3 ppm. MS (EI+): *m/z* 426 (M<sup>+</sup>, 100%). FT-IR (KBr) = 3425 (s, br), 3061 (w), 2922 (m), 2853 (w), 2201 (w), 1637 (w), 1588 (m), 1541 (w), 1452 (s), 1432 (m), 1364 (w), 1228 (w), 1089 (w), 1022 (w), 859 (w), 805 (m), 792 (m), 742 (m), 684 (s), 649 (w), 458 (w) cm<sup>-1</sup>. Anal. Calcd for C<sub>24</sub>H<sub>14</sub>N<sub>2</sub>S<sub>3</sub> = C: 67.58, H: 3.31, N: 6.57 %. Found: C, 67.91; H, 3.55; N, 6.22 %.

**bis-(3,5-di-*tert*-butyl-1,2-semiquinone)(1)cobalt(II) (2).** To a solution of Co<sub>4</sub>(DBSQ)<sub>8</sub><sup>3</sup> (0.175 g, 0.088 mmol) in anhydrous and deaerated toluene (15 mL) was added solid **1** (0.150 g, 0.469 mmol), and the mixture was stirred overnight under N<sub>2</sub> at room temperature. The solution was concentrated by half, and cooled in ice-water. The very dark green precipitate was isolated by vacuum filtration, washed with cold toluene, and dried to afford 0.160 g (43%) of **6**. MS (FAB+): *m/z* 926 [M<sup>+</sup>, 50%], 911 [(M - CH<sub>3</sub>)<sup>+</sup>, 100%]. FT-IR (KBr) = 3448 (m, br), 3071 (m), 2952 (s), 2902 (m), 2862 (m), 2202 (m), 1577 (m), 1490 (s), 1467 (s), 1355 (m), 1281 (w), 1243 (s), 1157 (w), 1093 (w), 1028 (w), 983 (m), 903 (w), 844 (w), 826 (w), 694 (m), 494 (w) cm<sup>-1</sup>. Anal. Calcd for C<sub>52</sub>H<sub>54</sub>N<sub>2</sub>S<sub>3</sub>O<sub>4</sub>Co = C: 67.44, H: 5.88, N: 3.03, S: 10.39. Found: C, 67.14; H, 5.64; N, 3.00; S, 10.15%.

Supplementary Material (ESI) for Chemical Communications  
 This journal is (c) The Royal Society of Chemistry 2009

1D carbon with proton decoupling

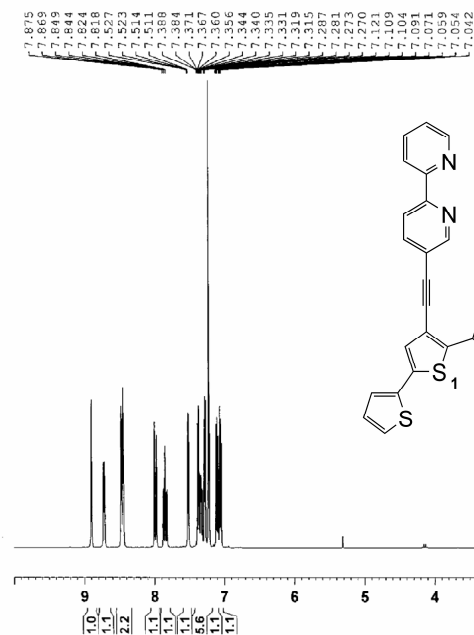

<sup>1</sup>H NMR spectrum of **1** (CDCl<sub>3</sub>)

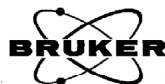

```

NAME      ThEtpy T0168 ligand
EXPNO    1
PROCNO   1
Date_    20081029
Time     22.06
INSTRUM  spect
PROBHD   5 mm PABBO BB-
PULPROG  zgpg30
TD        32768
SOLVENT  CDCl3
NS        16
DS        0
SWH       6172.839 Hz
FIDRES    0.188380 Hz
AQ        2.6542580 sec
RG        228.1
DW        81.000 usec
DE        6.00 usec
TE        296.7 K
D1        1.0000000 sec
TD0       1
    
```

```

----- CHANNEL f1 -----
NUC1      1H
P1        10.20 usec
PL1       0.00 dB
PL12      17.50 dB
PL13      17.50 dB
PL14      17.50 dB
PL15      17.50 dB
PL16      17.50 dB
PL17      17.50 dB
PL18      17.50 dB
PL19      17.50 dB
PL20      17.50 dB
PL21      17.50 dB
PL22      17.50 dB
PL23      17.50 dB
PL24      17.50 dB
PL25      17.50 dB
PL26      17.50 dB
PL27      17.50 dB
PL28      17.50 dB
PL29      17.50 dB
PL30      17.50 dB
PL31      17.50 dB
PL32      17.50 dB
PL33      17.50 dB
PL34      17.50 dB
PL35      17.50 dB
PL36      17.50 dB
PL37      17.50 dB
PL38      17.50 dB
PL39      17.50 dB
PL40      17.50 dB
PL41      17.50 dB
PL42      17.50 dB
PL43      17.50 dB
PL44      17.50 dB
PL45      17.50 dB
PL46      17.50 dB
PL47      17.50 dB
PL48      17.50 dB
PL49      17.50 dB
PL50      17.50 dB
PL51      17.50 dB
PL52      17.50 dB
PL53      17.50 dB
PL54      17.50 dB
PL55      17.50 dB
PL56      17.50 dB
PL57      17.50 dB
PL58      17.50 dB
PL59      17.50 dB
PL60      17.50 dB
PL61      17.50 dB
PL62      17.50 dB
PL63      17.50 dB
PL64      17.50 dB
PL65      17.50 dB
PL66      17.50 dB
PL67      17.50 dB
PL68      17.50 dB
PL69      17.50 dB
PL70      17.50 dB
PL71      17.50 dB
PL72      17.50 dB
PL73      17.50 dB
PL74      17.50 dB
PL75      17.50 dB
PL76      17.50 dB
PL77      17.50 dB
PL78      17.50 dB
PL79      17.50 dB
PL80      17.50 dB
PL81      17.50 dB
PL82      17.50 dB
PL83      17.50 dB
PL84      17.50 dB
PL85      17.50 dB
PL86      17.50 dB
PL87      17.50 dB
PL88      17.50 dB
PL89      17.50 dB
PL90      17.50 dB
PL91      17.50 dB
PL92      17.50 dB
PL93      17.50 dB
PL94      17.50 dB
PL95      17.50 dB
PL96      17.50 dB
PL97      17.50 dB
PL98      17.50 dB
PL99      17.50 dB
PL100     17.50 dB
    
```

154.98  
151.46  
149.31  
139.23  
139.03  
136.07  
135.56  
134.73  
127.33  
127.23  
126.00  
125.61  
125.18  
124.36  
123.95  
121.36  
120.42  
120.23  
117.10  
89.26

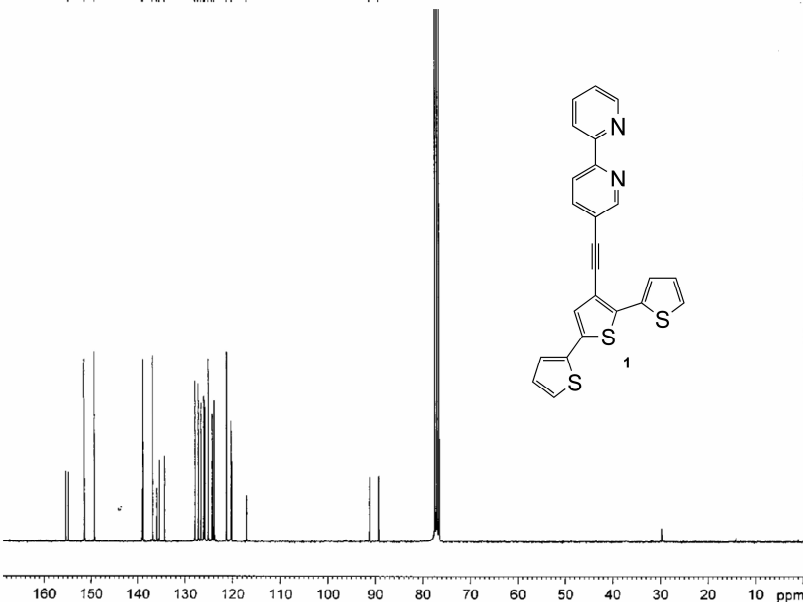

<sup>13</sup>C NMR spectrum of **1** (CDCl<sub>3</sub>)

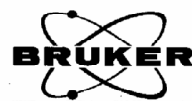

```

NAME      ThEtpy T0168 ligand carbon
EXPNO    1
PROCNO   1
Date_    20081029
Time     22.15
INSTRUM  spect
PROBHD   5 mm PABBO BB-
PULPROG  zgpg30
TD        32768
SOLVENT  CDCl3
NS        16
DS        0
SWH       17985.611 Hz
FIDRES    0.548977 Hz
AQ        0.9110004 sec
RG        1149.4
DW        27.800 usec
DE        6.00 usec
TE        296.9 K
D1        2.0000000 sec
D11       0.0300000 sec
TD0       1
    
```

```

----- CHANNEL f1 -----
NUC1      13C
P1        11.00 usec
PL1       -2.00 dB
PL12      17.50 dB
PL13      17.50 dB
PL14      17.50 dB
PL15      17.50 dB
PL16      17.50 dB
PL17      17.50 dB
PL18      17.50 dB
PL19      17.50 dB
PL20      17.50 dB
PL21      17.50 dB
PL22      17.50 dB
PL23      17.50 dB
PL24      17.50 dB
PL25      17.50 dB
PL26      17.50 dB
PL27      17.50 dB
PL28      17.50 dB
PL29      17.50 dB
PL30      17.50 dB
PL31      17.50 dB
PL32      17.50 dB
PL33      17.50 dB
PL34      17.50 dB
PL35      17.50 dB
PL36      17.50 dB
PL37      17.50 dB
PL38      17.50 dB
PL39      17.50 dB
PL40      17.50 dB
PL41      17.50 dB
PL42      17.50 dB
PL43      17.50 dB
PL44      17.50 dB
PL45      17.50 dB
PL46      17.50 dB
PL47      17.50 dB
PL48      17.50 dB
PL49      17.50 dB
PL50      17.50 dB
PL51      17.50 dB
PL52      17.50 dB
PL53      17.50 dB
PL54      17.50 dB
PL55      17.50 dB
PL56      17.50 dB
PL57      17.50 dB
PL58      17.50 dB
PL59      17.50 dB
PL60      17.50 dB
PL61      17.50 dB
PL62      17.50 dB
PL63      17.50 dB
PL64      17.50 dB
PL65      17.50 dB
PL66      17.50 dB
PL67      17.50 dB
PL68      17.50 dB
PL69      17.50 dB
PL70      17.50 dB
PL71      17.50 dB
PL72      17.50 dB
PL73      17.50 dB
PL74      17.50 dB
PL75      17.50 dB
PL76      17.50 dB
PL77      17.50 dB
PL78      17.50 dB
PL79      17.50 dB
PL80      17.50 dB
PL81      17.50 dB
PL82      17.50 dB
PL83      17.50 dB
PL84      17.50 dB
PL85      17.50 dB
PL86      17.50 dB
PL87      17.50 dB
PL88      17.50 dB
PL89      17.50 dB
PL90      17.50 dB
PL91      17.50 dB
PL92      17.50 dB
PL93      17.50 dB
PL94      17.50 dB
PL95      17.50 dB
PL96      17.50 dB
PL97      17.50 dB
PL98      17.50 dB
PL99      17.50 dB
PL100     17.50 dB
    
```

**EDX data for 2**

| Element | wt%         | atom% | *app. conc% | ZAF factor | 3 sigma |
|---------|-------------|-------|-------------|------------|---------|
| S       | 32.52       | 20.80 | 61.30       | 0.944      | 1.7592  |
| Co      | 20.49       | 7.13  | 28.02       | 0.685      | 2.7615  |
| Co:S    | <b>0.61</b> |       |             |            |         |

**EDX data for poly 2**

| Element | wt%         | atom% | app. conc% | ZAF factor | 3 sigma |
|---------|-------------|-------|------------|------------|---------|
| P       | 5.23        | 2.99  | 12.78      | 0.920      | 0.4995  |
| S       | 18.71       | 10.34 | 44.94      | 0.904      | 0.9849  |
| Co      | 12.47       | 3.75  | 22.08      | 0.667      | 1.5776  |
| Co:S    | <b>0.67</b> |       |            |            |         |

The "apparent concentration" is calculated directly from the intensity of the characteristic X-ray peak before corrections for atomic number, absorbance, and fluorescence (ZAF)

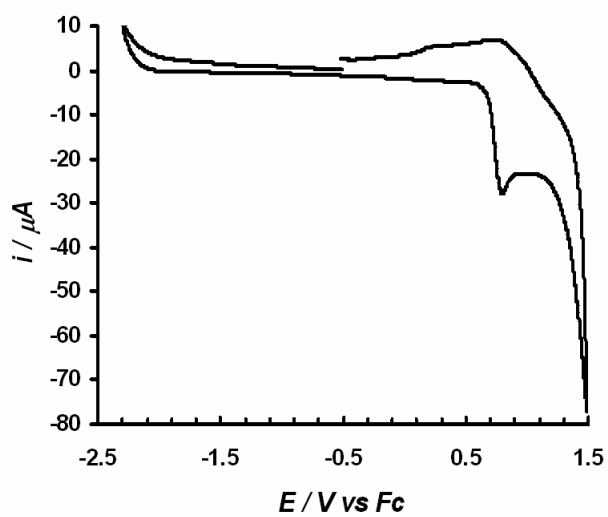

Cyclic voltammogram of **1** in CH<sub>2</sub>Cl<sub>2</sub>

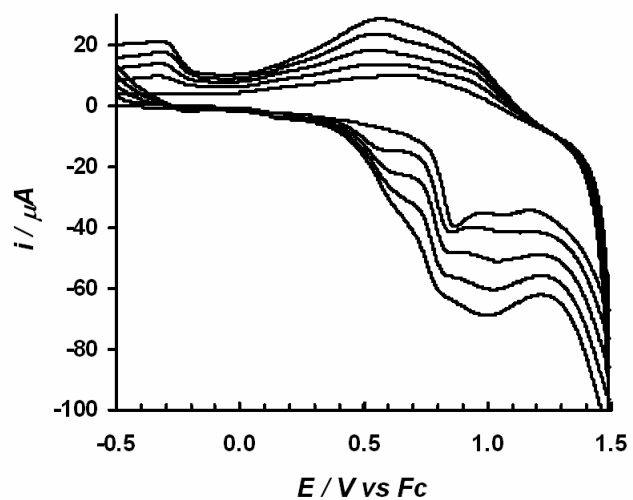

Electropolymerization of **1** in  $\text{CH}_2\text{Cl}_2$ .

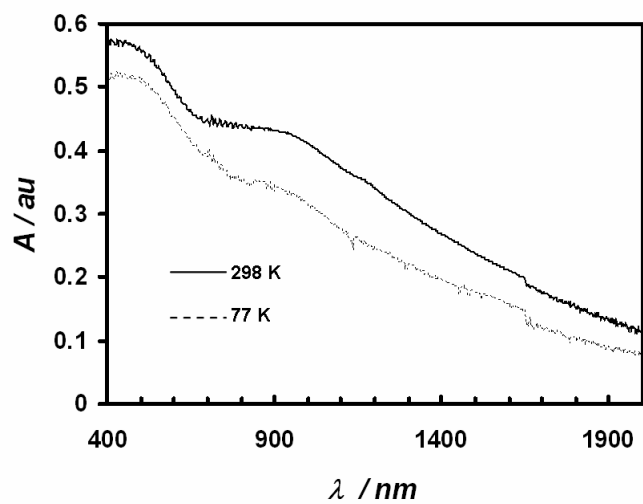

Vis-NIR spectra of **poly 1** at 298 and 77 K.

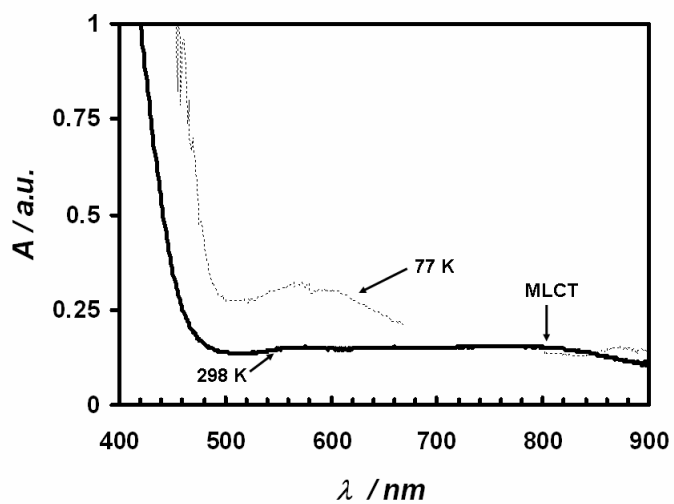

Visible spectrum of **2** at 298 and 77 K in toluene.

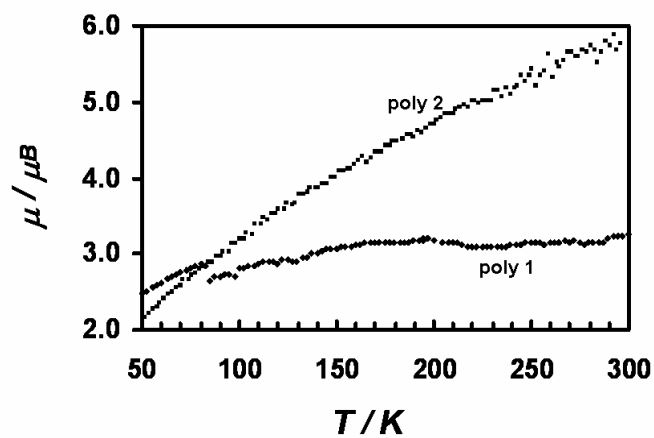

$\mu$  vs.  $T$  for poly **1** ( $\blacklozenge$ ) and poly **2** ( $\blacksquare$ ) on ITO glass.

## References

<sup>1</sup>Grosshenny, V.; Romero, F.M.; Ziesel, R. *J. Org. Chem.* **1997**, *62*, 1491-1500.

<sup>2</sup>O'Sullivan, T.J.; Djukic, B.; Dube, P.A.; Lemaire, M.T. *unpublished results*.

<sup>3</sup>Buchanan, R.M.; Fitzgerald, B.J.; Pierpont, C.G. *Inorg. Chem.* **1979**, *18*, 3439-3444.
